# Supplementary material for: Kayupovaite, Na 2 Mn 10 [(Si 14 Al 2 )O 38 (OH) 8 ] ⋅ 7H 2 O – a new stilpnomelane-related mineral from the Ushkatyn-III deposit, Kazakhstan
Source: Copernicus journal article supplement (doi:10.5194/ejm-37-829-2025), 2025-11-03
Supplement: Supplementary file [file ejm-37-829-2025-supplement-title-page.pdf › ejm-37-829-2025-supplement-title-page.pdf]

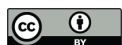

*Supplement of*

**Kayupovaite,  $\text{Na}_2\text{Mn}_{10}[(\text{Si}_{14}\text{Al}_2)\text{O}_{38}(\text{OH})_8]\cdot 7\text{H}_2\text{O}$  – a new stilpnomelane-related mineral from the Ushkatyn-III deposit, Kazakhstan**

**Oleg S. Vereshchagin et al.**

*Correspondence to:* Oleg S. Vereshchagin (o.vereshchagin@spbu.ru)

- ejm-37-829-2025-supplement-title-page.pdf
- Figure S1\_Kayupova.jpg
- Figure S1\_Kayupova\_source.txt
- Kayupovite.cif
- Kayupovite\_checkcif.pdf

The copyright of individual parts of the supplement might differ from the article licence.
